# Supplementary material for: Addressing Disparities in Cancer Screening among U.S. Immigrants: Progress and Opportunities
Source: Oxford University Press journal article supplement (doi:10.1158/1940-6207.capr-19-0249), 2020-03-01
Supplement: 19406207capr190249-sup-222212_2_supp_5804156_pz2bkv.doc [file 19406207capr190249-sup-222212_2_supp_5804156_pz2bkv.doc]

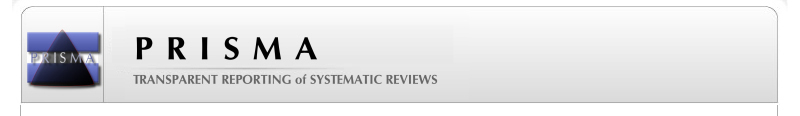
**Supplementary Figure 1. PRISMA 2009 Flow Diagram**

**Screening**

**Included**

**Eligibility**

**Identification**

Records identified through database searching
(n = 747)

Additional records identified through other sources
(n = 27)

Records after duplicates removed
(n = 719)

Records screened
(n = 719)

Records excluded
(n = 628)

Full-text articles assessed for eligibility
(n = 91)

Full-text articles excluded (n=49)

- Program development or description only (n=11)
- No intervention (n= 9)
- Not breast, cervical, or CRC screening (n=9)
- Outcome is not screening behavior (e.g., intention) (n= 8)
- Review/commentary (n=7)
- Unclear if sample is foreign-born or not explicitly targeting immigrants (n=3)
- Non-US study (n=2)

Studies included in review
(n = 42)
